# Supplementary material for: Contrasting Population and Diet Influences on Gut Length of an Omnivorous Tropical Fish, the Trinidadian Guppy (Poecilia reticulata)
Source: PLoS One. 2015 Sep 11;10(9):e0136079. doi: 10.1371/journal.pone.0136079 (PMC4567299; doi:10.1371/journal.pone.0136079)
Supplement: S1 Data — (XLSX) [file pone.0136079.s001.xlsx]

## Sheet: Sheet1
Number	Year	Season	Site	Drainage	Predation	indiv ID	sex	length	LOGfishLength	fish mass	occurrence	invert area	invert area (mm2)	invert area (mm2) logxform	#diatom	diatom area (mm2)	diatom area (mm2) logxform	diatoms comments	detritus area	detritus area (mm2)	detritus area (mm2) logxform	fil algae	fil algae area (mm2)	fil algae area (mm2) logxform	fil algae comments	SUM(inv,det,diat,filAl) mm2	%inv	%diatoms	%detritus	%fil algae	%fil algae+diatoms	%inv(arcsin xform)	%diat(arcsin xform)	%detritus(arcsin xform)	%filalg(arcsin xform)	%filalg+diat (arcsin xform)
1	2006	wet	Aripo	Aripo	HP	06-A-S1-L-1	F	16.33	1.21299	0.095	detritus, diatoms, inverts, fil algae, inorganic	0.03	0.69312	-0.100661	1148	0.881664	-0.00803714	medium	0.91	21.0246	1.32479	7	0.0224	-0.912219	Ulothrix	22.6218	0.0306394	0.038974	0.929396	0.000990194	0.0399642	0.175948	0.198724	1.30185	0.0314725	0.201267
2	2006	wet	Aripo	Aripo	HP	06-A-S1-L-10	F	15.94	1.20249	0.086	detritus, diatoms, inorganic	0	0	-1	736	0.565248	-0.177016	medium	1.22	28.1869	1.45159	0	0	-1		28.7521	0	0.0196593	0.980341	0	0.0196593	0	0.140675	1.43012	0	0.140675
3	2006	wet	Aripo	Aripo	HP	06-A-S3-L-2	F	15.58	1.19257	0.098	detritus, diatoms, inverts, inorganic	0.27	6.23808	0.801958	4	0.003072	-0.986859	medium	0.12	2.77248	0.458257	0	0	-1		9.01363	0.692072	0.000340817	0.307587	0	0.000340817	0.982538	0.0184623	0.587889	0	0.0184623
4	2006	wet	Aripo	Aripo	HP	06-A-s4-L-1	F	18.03	1.256	0.156	detritus, diatoms, inverts, inorganic	0.52	12.0141	1.08329	262	0.050304	-0.823029	small	0.96	22.1798	1.34791	0	0	-1		34.2442	0.350835	0.00146898	0.647696	0	0.00146898	0.633927	0.0383366	0.935331	0	0.0383366
5	2006	wet	Aripo	Aripo	HP	06-A-S4-L-18	F	14.56	1.16316	0.079	detritus, diatoms, inverts	0.42	9.70368	0.991389	51	0.039168	-0.856461	medium	0.57	13.1693	1.12285	0	0	-1		22.9121	0.423517	0.00170949	0.574773	0	0.00170949	0.708614	0.0413577	0.860453	0	0.0413577
6	2006	wet	Aripo	Aripo	HP	06-A-S4-L-19	F	16.59	1.21985	0.095	detritus, diatoms, inverts, inorganic	0.49	11.321	1.0577	7	0.005376	-0.977258	medium	0.35	8.0864	0.913093	0	0	-1		19.4127	0.583172	0.000276932	0.416551	0	0.000276932	0.868958	0.016642	0.701557	0	0.016642
7	2006	wet	Aripo	Aripo	HP	06-A-S3-L-4	F	16.72	1.22324	0.126	detritus, diatoms, inverts, inorganic	0.5	11.552	1.0664	240	0.04608	-0.835409	small	0.65	15.0176	1.17948	0	0	-1		26.6157	0.43403	0.00173131	0.564239	0	0.00173131	0.719235	0.041621	0.849815	0	0.041621
8	2006	wet	Aripo	Aripo	HP	06-A-S1-L-13	F	15.05	1.17754	0.075	detritus, diatoms, inverts, inorganic	0.02	0.46208	-0.250202	239	0.183552	-0.547367	medium	0.74	17.097	1.23545	0	0	-1		17.7426	0.0260435	0.0103453	0.963611	0	0.0103453	0.162089	0.101888	1.37886	0	0.101888
23	2006	wet	Aripo	Aripo	HP	06-A-S4-L-4	F	14.43	1.15927	0.083	detritus, diatoms, inverts, inorganic	0.32	7.39328	0.874672	65	0.01248	-0.948925	small	0.41	9.47264	0.981032	0	0	-1		16.8784	0.438032	0.000739407	0.561229	0	0.000739407	0.72327	0.0271954	0.846781	0	0.0271954
24	2006	wet	Aripo	Aripo	HP	06-A-S1-L-9	F	13.41	1.12743	0.055	detritus, diatoms, inverts, inorganic	0.04	0.92416	0.0103678	1138	0.873984	-0.0114482	medium	0.77	17.7901	1.25261	0	0	-1		19.5882	0.0471794	0.0446178	0.908203	0	0.0446178	0.218953	0.212832	1.26298	0	0.212832
25	2006	wet	Aripo	Aripo	HP	06-A-S3-L-5	F	16.37	1.21405	0.101	detritus, diatoms, inverts, fil algae, inorganic	0.1	2.3104	0.382089	96	0.018432	-0.926531	small	0.65	15.0176	1.17948	183	0.5856	-0.163929	Ulothrix	17.932	0.128842	0.00102788	0.837473	0.0326566	0.0336845	0.367138	0.0320661	1.15584	0.18171	0.18458
26	2006	wet	Aripo	Aripo	HP	06-A-S4-L-14	M	14.06	1.14799	0.074	detritus, diatoms, inverts, fil algae, inorganic	0.38	8.77952	0.948389	114	0.021888	-0.914039	small	0.31	7.16224	0.861071	15	0.048	-0.829738	Ulothrix	16.0116	0.548321	0.001367	0.447314	0.00299782	0.00436482	0.833795	0.0369815	0.732615	0.0547797	0.066115
27	2006	wet	Aripo	Aripo	HP	06-A-S4-L-2	F	14.03	1.14706	0.091	detritus, diatoms, inverts, inorganic	0.33	7.62432	0.88786	78	0.014976	-0.939393	small	0.13	3.00352	0.491855	0	0	-1		10.6428	0.716382	0.00140715	0.282211	0	0.00140715	1.00918	0.0375208	0.560058	0	0.0375208
28	2006	wet	Aripo	Aripo	HP	06-A-S4-L-20	F	14.88	1.1726	0.096	detritus, diatoms, inverts, fil algae, inorganic	0.39	9.01056	0.959545	61	0.011712	-0.9519	small	0.33	7.62432	0.88786	5	0.032	-0.879426	Mougeotia	16.6786	0.540247	0.000702218	0.457132	0.00191863	0.00262084	0.825689	0.0265025	0.742478	0.0438162	0.0512166
29	2006	wet	Aripo	Aripo	HP	06-A-S3-L-13	F	10.64	1.02694	0.032	detritus, diatoms, inverts, inorganic	1.01	23.335	1.36987	135	0.02592	-0.899905	small	0.14	3.23456	0.523039	0	0	-1		26.5955	0.877405	0.0009746	0.12162	0	0.0009746	1.21308	0.0312237	0.356228	0	0.0312237
30	2006	wet	Aripo	Aripo	HP	06-A-S4-L-27	F	11.37	1.05576	0.041	detritus, diatoms, inverts, fil algae, inorganic	0.55	12.7072	1.10745	95	0.01824	-0.927236	small	0.27	6.23808	0.801958	5	0.016	-0.935542	Ulothrix	18.9795	0.669522	0.000961036	0.328674	0.000843014	0.00180405	0.958348	0.0310055	0.610529	0.0290388	0.0424869
35	2006	wet	Aripo	Aripo	HP	06-A-S3-L-12	M	12.24	1.08778	0.046	detritus, diatoms, inverts, inorganic	0.18	4.15872	0.629279	7	0.001344	-0.994202	small	0.28	6.46912	0.817507	0	0	-1		10.6292	0.391255	0.000126444	0.608619	0	0.000126444	0.675777	0.011245	0.89489	0	0.011245
36	2006	wet	Aripo	Aripo	HP	06-A-S4-L-25	M	14.94	1.17435	0.073	detritus, diatoms, inverts, inorganic	0.23	5.31392	0.733512	52	0.009984	-0.95867	small	0.37	8.54848	0.93694	0	0	-1		13.8724	0.383057	0.000719703	0.616223	0	0.000719703	0.667362	0.0268305	0.902694	0	0.0268305
37	2006	wet	Aripo	Aripo	HP	06-A-S2-L-14	M	11.76	1.07041	0.045	detritus, inverts, inorganic	0.05	1.1552	0.0987129	0	0	-1		0.01	0.23104	-0.48012	0	0	-1		1.38624	0.833333	0	0.166667	0	0	1.15026	0	0.420534	0	0
38	2006	wet	Aripo	Aripo	HP	06-A-S2-L-19	F	11.62	1.06521	0.035	detritus, diatoms, inverts, inorganic	0.44	10.1658	1.01139	51	0.009792	-0.959429	small	0.28	6.46912	0.817507	0	0	-1		16.6447	0.610752	0.000588296	0.38866	0	0.000588296	0.897076	0.0242572	0.673117	0	0.0242572
39	2006	wet	Aripo	Aripo	HP	06-A-S2-L-23	M	11.51	1.06108	0.04	detritus, diatoms, inverts, inorganic	1.26	29.111	1.46555	150	0.0288	-0.890084	small	0.44	10.1658	1.01139	0	0	-1		39.3056	0.740633	0.00073272	0.258634	0	0.00073272	1.03645	0.0270721	0.533512	0	0.0270721
40	2006	wet	Aripo	Aripo	HP	06-A-S2-L-1	F	13.84	1.14114	0.073	detritus, diatoms, inverts, inorganic	0.07	1.61728	0.234841	6	0.001152	-0.995026	small	0.07	1.61728	0.234841	0	0	-1		3.23571	0.499822	0.000356027	0.499822	0	0.000356027	0.78522	0.0188698	0.78522	0	0.0188698
50	2006	wet	Aripo	Aripo	HP	06-A-S1-L-5	M	15.39	1.18724	0.091	detritus, diatoms, inverts, fil algae, inorganic	0	0	-1	300	0.2304	-0.48096	medium	0.66	15.2486	1.18607	5	0.016	-0.935542	Ulothrix	15.495	0	0.0148693	0.984098	0.00103259	0.0159019	0	0.122244	1.44436	0.0321394	0.126439
51	2006	wet	Aripo	Aripo	HP	06-A-S4-L-13	M	15.63	1.19396	0.074	detritus, diatoms, inverts, inorganic	0.85	19.6384	1.29531	37	0.007104	-0.970194	small	0.2	4.6208	0.674016	0	0	-1		24.2663	0.809287	0.000292752	0.19042	0	0.000292752	1.11886	0.0171108	0.451562	0	0.0171108
52	2006	wet	Aripo	Aripo	HP	06-A-S1-L-14	M	15.72	1.19645	0.075	detritus, diatoms, inverts, inorganic	0	0	-1	699	0.536832	-0.195975	medium	0.83	19.1763	1.28502	0	0	-1		19.7132	0	0.0272322	0.972768	0	0.0272322	0	0.16578	1.40502	0	0.16578
54	2006	wet	Aripo	Aripo	HP	06-A-S1-L-20	F	15.34	1.18583	0.087	detritus, diatoms, inorganic	0	0	-1	966	0.741888	-0.0747457	medium	0.63	14.5555	1.166	0	0	-1		15.2974	0	0.0484976	0.951502	0	0.0484976	0	0.222042	1.34875	0	0.222042
9	2006	wet	Naranjo	Aripo	LP	06-N-S3-H-6	F	22.78	1.35755	0.296	detritus, diatoms, inverts, fil algae, inorganic	0.82	18.9453	1.27979	24	0.018432	-0.926531	medium	0.65	15.0176	1.17948	4	0.0128	-0.947691	Ulothrix	33.9941	0.557311	0.000542212	0.441771	0.000376536	0.000918747	0.842835	0.0232875	0.727036	0.0194057	0.0303155
10	2006	wet	Naranjo	Aripo	LP	06-N-s2-L-3	F	16.31	1.21245	0.09	detritus, diatoms, inverts, inorganic	0.42	9.70368	0.991389	9	0.006912	-0.970974	medium	0.59	13.6314	1.13771	0	0	-1		23.342	0.415718	0.000296119	0.583985	0	0.000296119	0.700712	0.017209	0.869784	0	0.017209
11	2006	wet	Naranjo	Aripo	LP	06-N-S3-M-7	F	19.93	1.29951	0.185	detritus, diatoms, inverts, inorganic	2.13	49.2115	1.69295	211	0.040512	-0.852287	small	0.38	8.77952	0.948389	0	0	-1		58.0316	0.848013	0.000698103	0.151289	0	0.000698103	1.17032	0.0264247	0.399501	0	0.0264247
12	2006	wet	Naranjo	Aripo	LP	06-N-S2-H-10	F	17.98	1.25479	0.178	detritus, diatoms, inverts, inorganic	1.08	24.9523	1.39885	8	0.001536	-0.99338	small	0.88	20.3315	1.3103	0	0	-1		45.2854	0.551002	3.39182e-05	0.448964	0	3.39182e-05	0.836489	0.00582397	0.734273	0	0.00582397
13	2006	wet	Naranjo	Aripo	LP	06-N-S1-M-1	F	23.33	1.36791	0.302	detritus, diatoms, inverts, fil algae, inorganic	0.23	5.31392	0.733512	23	0.004416	-0.981233	small	0.96	22.1798	1.34791	368U+17M	12.864	1.11274	Ulothrix+Mougeotia	40.3622	0.131656	0.000109409	0.54952	0.318714	0.318824	0.371318	0.0104601	0.835	0.599885	0.600003
14	2006	wet	Naranjo	Aripo	LP	06-N-S2-M-9	F	16.67	1.22194	0.148	detritus, diatoms, invert parts, fil algae, inorganic	0.01	0.23104	-0.48012	5	0.00384	-0.983635	medium	0.54	12.4762	1.09955	0.4	9.2416	0.970421	weird algae	21.9526	0.0105245	0.000174922	0.568322	0.420979	0.421154	0.10277	0.0132262	0.853934	0.706044	0.706222
15	2006	wet	Naranjo	Aripo	LP	06-N-S2-H-3	F	22.85	1.35889	0.333	detritus, diatoms, inverts, plant material, inorganic	0.23	5.31392	0.733512	8	0.001536	-0.99338	small	1.05	24.2592	1.38666	0	0	-1		29.5747	0.179678	5.19364e-05	0.82027	0	5.19364e-05	0.43773	0.00720675	1.133	0	0.00720675
16	2006	wet	Naranjo	Aripo	LP	06-N-S3-H-3	F	23.41	1.3694	0.276	detritus, diatoms, fil algae, inorganic	0	0	-1	5	0.00384	-0.983635	medium	0.7	16.1728	1.21146	30U+3M	1.152	0.0976043	Ulothrix+Mougeotia	17.3286	0	0.000221598	0.933299	0.0664795	0.0667011	0	0.0148867	1.30957	0.260782	0.261226
17	2006	wet	Naranjo	Aripo	LP	06-N-S1-L-4	M	16.22	1.21005	0.11	detritus, diatoms, inverts, fil algae, inorganic	0.14	3.23456	0.523039	170	0.13056	-0.637216	medium	0.74	17.097	1.23545	1	0.0032	-0.98632	Ulothrix	20.4653	0.158051	0.00637959	0.835413	0.000156362	0.00653595	0.408852	0.0799575	1.15306	0.0125048	0.0809335
18	2006	wet	Naranjo	Aripo	LP	06-N-S2-H-7	F	20.33	1.30814	0.229	detritus, diatoms, inverts, fil algae, inorganic	0.22	5.08288	0.714571	2	0.001536	-0.99338	medium	1.77	40.8941	1.61272	77	0.2464	-0.460422	Ulothrix	46.2249	0.10996	3.32288e-05	0.884677	0.00533046	0.00536369	0.338001	0.00576448	1.22431	0.073075	0.0733028
19	2006	wet	Naranjo	Aripo	LP	06-N-S1-M-12	F	19.67	1.2938	0.213	detritus, diatoms, inverts, fil algae, plant mat, inorganic	0.61	14.0934	1.15209	94	0.072192	-0.763987	medium	1.85	42.7424	1.63187	213	0.6816	-0.107015	Ulothrix	57.5896	0.244722	0.00125356	0.742189	0.0118355	0.013089	0.517482	0.035413	1.03822	0.109007	0.114658
20	2006	wet	Naranjo	Aripo	LP	06-N-S1-M-16	F	17.61	1.24576	0.134	detritus, diatoms, inverts, inorganic	1.92	44.3597	1.64797	149	0.028608	-0.890732	small	0.36	8.31744	0.92518	0	0	-1		52.7057	0.841648	0.000542787	0.157809	0	0.000542787	1.16153	0.0232999	0.40852	0	0.0232999
21	2006	wet	Naranjo	Aripo	LP	06-N-S2-L-8	F	10.21	1.00903	0.022	detritus, inverts, inorganic	0.41	9.47264	0.981032	0	0	-1		0.15	3.4656	0.552133	0	0	-1		12.9382	0.732143	0	0.267857	0	0	1.02681	0	0.543984	0	0
22	2006	wet	Naranjo	Aripo	LP	06-N-S1-M-11	F	18.63	1.27021	0.173	detritus, diatoms, inverts, fil algae, inorganic	0.1	2.3104	0.382089	63	0.048384	-0.828613	medium	0.81	18.7142	1.27449	0	0	-1		21.073	0.109638	0.00229602	0.888066	0	0.00229602	0.337486	0.0479351	1.22965	0	0.0479351
31	2006	wet	Naranjo	Aripo	LP	06-N-S2-L-7	F	10.45	1.01912	0.026	detritus, diatoms, inverts, fil algae, inorganic	0.7	16.1728	1.21146	40	0.00768	-0.967865	small	0.37	8.54848	0.93694	3	0.0096	-0.960189	Ulothrix	24.7386	0.653749	0.000310447	0.345553	0.000388058	0.000698505	0.941679	0.0176204	0.628383	0.0197005	0.0264323
32	2006	wet	Naranjo	Aripo	LP	06-N-S2-L-6	U	10.59	1.0249	0.026	detritus, diatoms, inverts, inorganic	0.97	22.4109	1.35239	42	0.008064	-0.966319	small	0.29	6.70016	0.832519	0	0	-1		29.1191	0.769628	0.000276932	0.230095	0	0.000276932	1.07017	0.016642	0.500292	0	0.016642
33	2006	wet	Naranjo	Aripo	LP	06-N-S2-L-9	U	11.1	1.04532	0.028	detritus, diatoms, inverts, inorganic	0.91	21.0246	1.32479	41	0.007872	-0.967091	small	0.4	9.2416	0.970421	0	0	-1		30.2741	0.694476	0.000260024	0.305264	0	0.000260024	0.985145	0.016126	0.585369	0	0.016126
34	2006	wet	Naranjo	Aripo	LP	06-N-S2-L-11	U	10.93	1.03862	0.027	detritus, diatoms, inverts, fil algae, inorganic	0.03	0.69312	-0.100661	18	0.003456	-0.985244	small	0.41	9.47264	0.981032	268	0.8576	-0.0188159	Ulothrix	11.0268	0.0628577	0.000313418	0.859055	0.077774	0.0780875	0.253418	0.0177045	1.18594	0.282628	0.283212
41	2006	wet	Naranjo	Aripo	LP	06-N-S2-M-15	M	17.13	1.23376	0.16	detritus, diatoms, inverts, fil algae, inorganic	0.03	0.69312	-0.100661	52	0.039936	-0.854071	medium	1.3	30.0352	1.47907	23U-28M	2.528	0.419625	Ulothrix+Mougeotia	33.2963	0.0208168	0.00119941	0.902059	0.0759245	0.0771239	0.144785	0.0346395	1.25249	0.279155	0.281411
42	2006	wet	Naranjo	Aripo	LP	06-N-S2-M-16	M	16.42	1.21537	0.113	detritus, diatoms, inverts, inorganic	0.05	1.1552	0.0987129	7	0.005376	-0.977258	medium	0.26	6.00704	0.785831	0	0	-1		7.16762	0.161169	0.00075004	0.838081	0	0.00075004	0.413109	0.0273903	1.15667	0	0.0273903
43	2006	wet	Naranjo	Aripo	LP	06-N-S2-M-13	F	14.84	1.17143	0.104	detritus, diatoms, inverts, inorganic	0.64	14.7866	1.17279	27	0.005184	-0.97805	small	0.28	6.46912	0.817507	0	0	-1		21.2609	0.695483	0.000243828	0.304274	0	0.000243828	0.986238	0.0156156	0.584293	0	0.0156156
44	2006	wet	Naranjo	Aripo	LP	06-N-S2-L-5	F	15.75	1.19728	0.075	detritus, diatoms, inverts, inorganic	0.67	15.4797	1.19256	54	0.010368	-0.957157	small	0.28	6.46912	0.817507	0	0	-1		21.9592	0.70493	0.000472149	0.294598	0	0.000472149	0.996549	0.0217307	0.57373	0	0.0217307
45	2006	wet	Naranjo	Aripo	LP	06-N-S3-M-25	M	13.97	1.1452	0.091	detritus, diatoms, inverts, inorganic	0.54	12.4762	1.09955	8	0.001536	-0.99338	small	0.27	6.23808	0.801958	0	0	-1		18.7158	0.666612	8.20698e-05	0.333306	0	8.20698e-05	0.955259	0.00905936	0.615451	0	0.00905936
46	2006	wet	Naranjo	Aripo	LP	06-N-S3-M-26	M	15.6	1.19312	0.113	detritus, diatoms, inverts, inorganic	0.31	7.16224	0.861071	31	0.023808	-0.907251	medium	0.59	13.6314	1.13771	0	0	-1		20.8174	0.344051	0.00114366	0.654806	0	0.00114366	0.626803	0.0338245	0.94279	0	0.0338245
47	2006	wet	Naranjo	Aripo	LP	06-N-S1-M-9	M	18.54	1.26811	0.182	detritus, diatoms, inverts, fil algae, inorganic	0.04	0.92416	0.0103678	161	0.030912	-0.883021	small	0.76	17.559	1.24697	16	0.0512	-0.820448	Ulothrix	18.5653	0.0497789	0.00166504	0.945798	0.00275783	0.00442287	0.225006	0.0408162	1.33583	0.0525392	0.0665538
48	2006	wet	Naranjo	Aripo	LP	06-N-S1-L-8	M	16.96	1.22943	0.128	detritus, diatoms, inverts, fil algae, inorganic	0	0	-1	108	0.082944	-0.737682	medium	1.35	31.1904	1.49541	2	0.0064	-0.973058	Ulothrix	31.2797	0	0.00265168	0.997144	0.000204605	0.00285629	0	0.0515173	1.51733	0.0143045	0.0534697
49	2006	wet	Naranjo	Aripo	LP	06-N-S3-H-4	M	17.52	1.24353	0.112	detritus, diatoms, inverts, fil algae, inorganic	0.44	10.1658	1.01139	108	0.082944	-0.737682	medium	0.92	21.2557	1.32951	214	1.3696	0.167199	Mougeotia	32.874	0.309234	0.00252309	0.646581	0.0416621	0.0441852	0.589672	0.0502515	0.934164	0.205558	0.211782
53	2006	wet	Naranjo	Aripo	LP	06-N-S1-M-15	M	17.03	1.23121	0.137	detritus, diatoms, inverts, fil algae, inorganic	0.1	2.3104	0.382089	106	0.020352	-0.919547	small	0.89	20.5626	1.31518	2U-5M	0.384	-0.315155	Ulothrix+Mougeotia	23.2773	0.0992554	0.000874328	0.883373	0.0164968	0.0173711	0.320508	0.0295733	1.22228	0.128795	0.132184
7	2007	dry	Aripo	Aripo	HP	07-A-S1-L-10	U	9.77	0.989895	0.028		0.523333	12.0911	1.08604	113	0.3616	-0.335734		0.0313333	0.723925	-0.0841121	3	0.096	-0.707744		13.2726	0.91098	0.0272441	0.0545428	0.00723294	0.034477	1.26782	0.165817	0.235721	0.0851495	0.186764
10	2007	dry	Aripo	Aripo	HP	07-A-S1-L-8	F	10.55	1.02325	0.031		3.74911	86.6195	1.93812	902	2.8864	0.475148		0.974667	22.5187	1.35447	61	1.952	0.312177		113.977	0.759976	0.0253245	0.197573	0.0171263	0.0424508	1.0588	0.159816	0.460607	0.131244	0.207522
9	2007	dry	Aripo	Aripo	HP	07-A-S1-H-13	F	11.17	1.04805	0.052		0.125778	2.90597	0.477985	146	0.4672	-0.246264		0.0266667	0.616107	-0.145022	2	0.064	-0.785156		4.05328	0.716943	0.115265	0.152002	0.0157897	0.131054	1.0098	0.346392	0.400495	0.12599	0.370428
8	2007	dry	Aripo	Aripo	HP	07-A-S1-L-4	F	11.41	1.05729	0.045		0	0	-1	181	0.5792	-0.168002		0.116667	2.69547	0.446454	10	0.32	-0.376751		3.59467	0	0.161128	0.749852	0.0890208	0.250148	0	0.413053	1.04703	0.302978	0.52377
33	2007	dry	Aripo	Aripo	HP	07-A-S3-H-37	F	11.77	1.07078	0.046		0.587048	13.5631	1.13555	0	0	-1		0.035	0.80864	-0.0416081	0	0	-1		14.3718	0.943734	0	0.0562658	0	0	1.33131	0	0.239487	0	0
5	2007	dry	Aripo	Aripo	HP	07-A-S1-L-1	F	12.41	1.09377	0.038		0.386667	8.93355	0.955858	25	0.08	-0.744727		0.016	0.369664	-0.328213	0	0	-1		9.38321	0.952078	0.00852587	0.0393963	0	0.00852587	1.3501	0.0924673	0.199812	0	0.0924673
6	2007	dry	Aripo	Aripo	HP	07-A-S1-L-3	F	12.98	1.11327	0.067		0.123333	2.84949	0.469747	189	0.6048	-0.151934		0.109333	2.52604	0.419301	1	0.032	-0.879426		6.01233	0.473942	0.100593	0.420143	0.0053224	0.105916	0.759328	0.322738	0.705197	0.0730196	0.331484
32	2007	dry	Aripo	Aripo	HP	07-A-S3-H-23	M	13.56	1.13226	0.055		0.299	6.9081	0.8456	0	0	-1		0	0	-1	0	0	-1		6.9081	1	0	0	0	0	1.5708	0	0	0	0
3	2007	dry	Aripo	Aripo	HP	07-A-S1-H-10	F	14.69	1.16702	0.06		0	0	-1	167	0.5344	-0.197637		0.57	13.1693	1.12285	44	1.408	0.178401		15.1117	0	0.0353634	0.871464	0.093173	0.128536	0	0.189178	1.20411	0.310193	0.366682
4	2007	dry	Aripo	Aripo	HP	07-A-S1-H-16	M	16.24	1.21059	0.114		0.672	15.5259	1.19384	30	0.096	-0.707744		0.068	1.57107	0.222995	0	0	-1		17.193	0.903038	0.00558368	0.0913788	0	0.00558368	1.25414	0.0747937	0.307093	0	0.0747937
34	2007	dry	Aripo	Aripo	HP	07-A-S3-H-14	M	16.36	1.21378	0.101		0.728667	16.8351	1.22879	3	0.0096	-0.960189		0.1	2.3104	0.382089	0	0	-1		19.1551	0.878884	0.000501172	0.120615	0	0.000501172	1.21534	0.0223887	0.354687	0	0.0223887
2	2007	dry	Aripo	Aripo	HP	07-A-S1-H-2	F	18.74	1.27277	0.214		1.1	25.4144	1.40679	2	0.0064	-0.973058		0	0	-1	0	0	-1		25.4208	0.999748	0.000251762	0	0	0.000251762	1.55493	0.0158677	0	0	0.0158677
13	2007	dry	Aripo	Aripo	HP	07-A-S2-H-6	F	18.9	1.27646	0.154		0.440333	10.1735	1.01172	4	0.0128	-0.947691		0.243631	5.62885	0.758067	0	0	-1		15.8151	0.643275	0.000809353	0.355916	0	0.000809353	0.93071	0.028453	0.639242	0	0.028453
14	2007	dry	Aripo	Aripo	HP	07-A-S3-H-6	F	18.97	1.27807	0.181		0.168667	3.89687	0.601721	1	0.0032	-0.98632		0.149333	3.4502	0.550252	0	0	-1		7.35027	0.530167	0.000435358	0.469397	0	0.000435358	0.815584	0.0208667	0.754776	0	0.0208667
1	2007	dry	Aripo	Aripo	HP	07-A-S1-H-6	F	19.57	1.29159	0.231		0.818	18.8991	1.27873	49	0.1568	-0.590405		0.0366667	0.847147	-0.0235828	1	0.032	-0.879426		19.935	0.948034	0.00786556	0.0424954	0.00160522	0.00947077	1.34081	0.0888046	0.207633	0.0400759	0.0974722
31	2007	dry	Aripo	Aripo	HP	07-A-S3-H-2	F	20.2	1.30535	0.234		0.295333	6.82338	0.840318	0	0	-1		0.0746667	1.7251	0.261286	2	0.064	-0.785156		8.61248	0.792267	0	0.200302	0.00743108	0.00743108	1.09755	0	0.464025	0.0863108	0.0863108
60	2007	dry	Aripo	Aripo	HP	07-A-S2-H-4	M	17.66	1.24699	0.111		0.26	6.00704	0.785831	450	1.44	0.187521		0.58	13.4003	1.13034	9	0.288	-0.411168	Ulothrix	21.1354	0.284218	0.0681323	0.634024	0.0136265	0.0817587	0.562285	0.26408	0.921081	0.116999	0.289982
61	2007	dry	Aripo	Aripo	HP	07-A-S3-H-30	M	15.73	1.19673	0.101		0.81	18.7142	1.27449	25	0.08	-0.744727		0.19	4.38976	0.652223	0	0	-1		23.184	0.807205	0.00345066	0.189344	0	0.00345066	1.11622	0.0587761	0.450191	0	0.0587761
18	2007	dry	Naranjo	Aripo	LP	07-N-S1-L-15	U	8.21	0.914343	0.01		0	0	-1	31	0.0992	-0.700711		0.0146667	0.338859	-0.357675	1	0.032	-0.879426		0.470059	0	0.211037	0.720886	0.0680766	0.279114	0	0.477306	1.01418	0.26397	0.556612
19	2007	dry	Naranjo	Aripo	LP	07-N-S1-L-2	U	12.79	1.10687	0.048		0.02	0.46208	-0.250202	3	0.0096	-0.960189		0.05	1.1552	0.0987129	1	0.032	-0.879426		1.65888	0.278549	0.00578704	0.696373	0.0192901	0.0250772	0.555982	0.0761461	0.987206	0.139339	0.159027
39	2007	dry	Naranjo	Aripo	LP	07-N-S3-M-29	F	13.47	1.12937	0.064		0.0502444	1.16085	0.100663	150	0.48	-0.236572		0.487778	11.2696	1.05575	20	0.64	-0.130768		13.5505	0.0856685	0.0354231	0.831678	0.0472309	0.082654	0.297041	0.18934	1.14804	0.219075	0.291612
20	2007	dry	Naranjo	Aripo	LP	07-N-S1-L-3	F	15.18	1.18127	0.075		0.005	0.11552	-0.666512	84	0.2688	-0.433209		0.593333	13.7084	1.14014	4	0.128	-0.642065		14.2207	0.00812337	0.018902	0.963974	0.00900097	0.027903	0.0902522	0.137922	1.37983	0.0950163	0.167829
21	2007	dry	Naranjo	Aripo	LP	07-N-S1-H-34	F	24.36	1.38668	0.344		0.383	8.84883	0.951766	126	0.4032	-0.298259		0.762	17.6052	1.2481	4	0.128	-0.642065		26.9853	0.327913	0.0149415	0.652402	0.00474333	0.0196848	0.609719	0.122542	0.940264	0.0689264	0.140767
42	2007	dry	Naranjo	Aripo	LP	07-N-S1-L-4	F	13.97	1.1452	0.061		0.5199	12.0118	1.08321	21	0.0672	-0.776764		0.519714	12.0075	1.08305	0	0	-1		24.0864	0.498694	0.00278995	0.498516	0	0.00278995	0.784092	0.0528446	0.783914	0	0.0528446
43	2007	dry	Naranjo	Aripo	LP	07-N-S1-M-6	F	19.93	1.29951	0.186		0.717708	16.5819	1.22225	15	0.048	-0.829738		1.41667	32.7307	1.51628	1	0.032	-0.879426		49.3926	0.335717	0.000971805	0.662663	0.00064787	0.00161968	0.618006	0.0311788	0.951077	0.025456	0.0402561
44	2007	dry	Naranjo	Aripo	LP	07-N-S3-M-14	F	22.46	1.35141	0.274		0.0436458	1.00839	0.0446939	50	0.16	-0.585027		1.28206	29.6207	1.47306	2	0.064	-0.785156		30.8531	0.0326837	0.00518586	0.960056	0.00207435	0.00726021	0.181786	0.0720753	1.36958	0.0455607	0.0853103
45	2007	dry	Naranjo	Aripo	LP	07-N-S2-H-4	F	20.81	1.31827	0.27		0.321806	7.435	0.877083	29	0.0928	-0.714893		0.831517	19.2114	1.28581	8	0.256	-0.44855		26.9952	0.27542	0.00343765	0.71166	0.00948318	0.0129208	0.552485	0.0586652	1.00395	0.0975362	0.113916
50	2007	dry	Naranjo	Aripo	LP	07-N-S1-L-27	U	11.02	1.04218	0.027		0.21	4.85184	0.694767	200	0.64	-0.130768		0.424	9.7961	0.995464	0	0	-1		15.2879	0.317364	0.0418631	0.640773	0	0.0418631	0.598436	0.20606	0.928101	0	0.20606
51	2007	dry	Naranjo	Aripo	LP	07-N-S1-M-29	U	10.35	1.01494	0.021		0.6	13.8624	1.14496	176	0.5632	-0.178355		0.29	6.70016	0.832519	292	9.344	0.975156	Ulothrix	30.4698	0.454956	0.0184839	0.219895	0.306665	0.325149	0.740293	0.136378	0.488079	0.586889	0.606771
52	2007	dry	Naranjo	Aripo	LP	07-N-S1-L-6	F	14.56	1.16316	0.065		0.09	2.07936	0.338329	805	2.576	0.427486		0.78	18.0211	1.25819	100	3.2	0.518514	Mougeotia (0.05)	25.8765	0.0803571	0.0995499	0.696429	0.123664	0.223214	0.287414	0.321	0.987266	0.359343	0.492075
53	2007	dry	Naranjo	Aripo	LP	07-N-S3-M-24	F	16.2	1.20952	0.123		0.26	6.00704	0.785831	1954	6.2528	0.802965		0.83	19.1763	1.28502	50	1.6	0.230449	Mougeotia (0.1)	33.0362	0.181832	0.189271	0.580465	0.0484318	0.237703	0.440529	0.450097	0.866214	0.221888	0.509279
62	2007	dry	Naranjo	Aripo	LP	07-N-S1-H-23	M	17.31	1.2383	0.125		0	0	-1	72	0.2304	-0.48096		0.84	19.4074	1.2902	0	0	-1		19.6378	0	0.0117325	0.988268	0	0.0117325	0	0.10853	1.46227	0	0.10853
63	2007	dry	Naranjo	Aripo	LP	07-N-S3-M-25	M	16.7	1.22272	0.112		0.13	3.00352	0.491855	990	3.168	0.514282		0.81	18.7142	1.27449	0	0	-1		24.8858	0.120692	0.127302	0.752006	0	0.127302	0.354806	0.364833	1.04952	0	0.364833
68	2007	dry	Aripo	Aripo	HP	07-A-S2-H-18	F	18.02	1.25575	0.121		0.39	9.01056	0.959545	101	0.3232	-0.373454		0.18	4.15872	0.629279	24	0.768	-0.0614803		14.2605	0.631855	0.022664	0.291626	0.0538551	0.0765192	0.918832	0.15112	0.570465	0.234202	0.280276
69	2007	dry	Aripo	Aripo	HP	07-A-S2-M-4	F	16.04	1.2052	0.076		0.48	11.0899	1.04883	93	0.2976	-0.400554		0.3	6.9312	0.847029	2	0.064	-0.785156		18.3827	0.60328	0.0161891	0.37705	0.00348153	0.0196706	0.889427	0.127582	0.661174	0.0590388	0.140716
70	2007	dry	Naranjo	Aripo	LP	07-N-S1-M-14	F	14.32	1.15594	0.071		0.17	3.92768	0.605055	361	1.1552	0.0987129		0.6	13.8624	1.14496	1	0.032	-0.879426		18.9773	0.206967	0.0608728	0.730473	0.00168623	0.062559	0.472301	0.249298	1.02493	0.0410752	0.252802
72	2007	dry	Aripo	Aripo	HP	07-A-S2-M-11	F	13.83	1.14082	0.041		0.44	10.1658	1.01139	587	1.8784	0.296314		0.12	2.77248	0.458257	0	0	-1		14.8166	0.686104	0.126776	0.187119	0	0.126776	0.976092	0.364045	0.447345	0	0.364045
78	2007	dry	Naranjo	Aripo	LP	07-N-S2-H-17	F	11.31	1.05346	0.04		0	0	-1	590	1.888	0.298416		0.17	3.92768	0.605055	5	0.16	-0.585027		5.97568	0	0.315947	0.657277	0.0267752	0.342723	0	0.596913	0.945392	0.16437	0.625404
79	2007	dry	Naranjo	Aripo	LP	07-N-S2-M-9	F	13.93	1.14395	0.075		0	0	-1	469	1.5008	0.204337		0.24	5.54496	0.751661	0	0	-1		7.04576	0	0.213008	0.786992	0	0.213008	0	0.479716	1.09108	0	0.479716
80	2007	dry	Naranjo	Aripo	LP	07-N-S2-M-5	F	16.71	1.22298	0.122		0.01	0.23104	-0.48012	975	3.12	0.507856		0.975	22.5264	1.35462	0	0	-1		25.8774	0.00892824	0.120568	0.870503	0	0.120568	0.0946305	0.354615	1.20268	0	0.354615
81	2007	dry	Naranjo	Aripo	LP	07-N-S2-L-3	F	14.78	1.16967	0.076		0	0	-1	1100	3.52	0.558709		0.545	12.5917	1.10352	10	0.32	-0.376751		16.4317	0	0.21422	0.766305	0.0194746	0.233695	0	0.481196	1.06624	0.140008	0.504557
